# Supplementary material
Source: PubMed Central journal article supplement (PMC6497555)

Supplementary Data for

**GnRH-R targeted lytic peptide sensitizes BRCA wild-type ovarian cancer to PARP inhibition**

Running title: EP-100 sensitizes ovarian cancer cells to olaparib

Shaolin Ma<sup>1,2</sup>, Sunila Pradeep<sup>1,3</sup>, Alejandro Villar-Prados<sup>1,4</sup>, Yunfei, Wen<sup>1</sup>, Emine Bayraktar<sup>1</sup>, Lingegowda S. Mangala<sup>1</sup>, Mark Seungwook Kim<sup>1</sup>, Sherry Y. Wu<sup>1</sup>, Wei Hu<sup>1</sup>, Cristian Rodriguez-Aguayo<sup>5,6</sup>, Carola Leuschner<sup>7</sup>, Xiaoyan Liang<sup>2</sup>, Prahlad T. Ram<sup>8</sup>, Katharina Schlacher<sup>5</sup>, Robert L. Coleman<sup>1</sup> and Anil K. Sood<sup>1,5,9</sup>

<sup>1</sup>Department of Gynecologic Oncology and Reproductive Medicine, The University of Texas MD Anderson Cancer Center, Houston, TX, USA; <sup>2</sup>Reproductive Medicine Research Center, the Sixth Affiliated Hospital of Sun Yat-Sen University, Guangzhou, China; <sup>3</sup>Department of Obstetrics and Gynecology, Medical College of Wisconsin, Milwaukee, WI, 53226, USA; <sup>4</sup>University of Puerto Rico, School of Medicine, Medical Sciences Campus, San Juan, PR, 00936, USA ; <sup>5</sup>Department of Cancer Biology, The University of Texas MD Anderson Cancer Center, Houston, TX, USA; <sup>6</sup>Department of Experimental Therapeutics, The University of Texas MD Anderson Cancer Center, Houston, TX, USA; <sup>7</sup>VP of Research, Esperance Pharmaceuticals, 909 Fannin, Suite 2000, Houston, TX 77010-1028; <sup>8</sup>Department of Systems Biology, The University of Texas MD Anderson Cancer Center, Houston, TX, USA; <sup>9</sup>Center for RNA Interference and Non-Coding RNA, The University of Texas MD Anderson Cancer Center, Houston, TX, USA.

Correspondence: Dr. A K Sood, Department of Gynecologic Oncology and Reproductive Medicine, Unit 1362, The University of Texas MD Anderson Cancer Center, 1515 Holcombe Boulevard, Houston, TX 77030, USA. Phone: 713-745-5266; Fax: 713-792-7586; E-mail: [asood@mdanderson.org](mailto:asood@mdanderson.org)

## Supplementary Materials

### Chemical structure and amino acid sequence of EP-100:

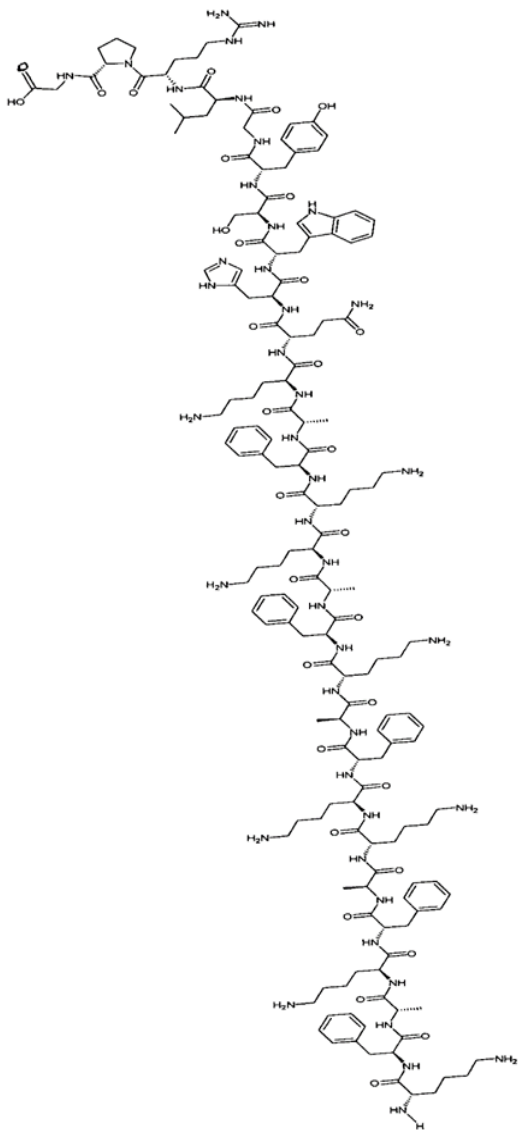

The complete amino acid sequence: Lys - Phe - Ala - Lys - Phe - Ala - Lys - Lys - Phe - Ala - Lys - Phe - Ala - Lys - Lys - Phe - Ala - Lys - Gln -His - Trp - Ser - Tyr - Gly - Leu - Arg - Pro - Gly.

## Figures and Figure Legends

### **Supplementary Figure S1. Expression and localization of GnRH-R in ovarian cancer cells.**

(A) Normal human ovary tissues (Normal#1 and Normal#2) were used as negative controls. Two de-identified normal samples were collected under the IRB-approved lab 02-188 protocol. (B) Cells were fixed without permeabilization and images were acquired by confocal microscope (TCS SP5 MP; Leica Microsystems, Buffalo Grove, IL). (C) Cells were fixed and permeabilized. Images were acquired by Leica DM4000 B LED microscope. Scale bar: 50  $\mu$ M.

### **Supplementary Figure S2. The effects of GnRH-R loss on the cytotoxicity of EP-100.** (A)

Confirmation of the knockdown efficiency of GnRH-R according to Western blot analysis 48 h after transfection of HeyA8 and A2780ip2 cells with shGnRH-R or scrambled plasmid. (B) Viability of shGnRH-R cells after treatment with different concentrations of EP-100 after 4 hrs. (C) Viability of shGnRH-R cells after treatment with different concentrations of EP-100 after 72 hrs. Error bars are standard deviations. (D) Cell viability of shGnRH-R cells treated with the combination of EP-100 and olaparib and Fa-CI plots in shGnRH-R cells. Dose-response curves for cell viability were representative of three experiments. The Fa-CI plots represent the mean  $\pm$  standard deviation values calculated from three independent experiments. A CI less than 1.0 indicates a synergistic effect and a CI greater than 1.0 indicates antagonism.

### **Supplementary Figure S3. Effects of chemotherapeutic agents on the viability of ovarian cancer cells.**

The representative cell viability curves for (A) doxorubicin, (B) paclitaxel, (C) olaparib, (D) topotecan, and (E) cisplatin against ovarian cancer cells. IC<sub>50</sub> values are presented as mean  $\pm$  standard deviation from three independent experiments. Dose-response curves for cell viability were representative of three experiments.

### **Supplementary Figure S4. Combined effects of EP-100 with doxorubicin, paclitaxel,**

**topotecan and cisplatin on ovarian cancer cells.** HeyA8, HeyA8-MDR, A2780ip2 and A2780CP20 cell viabilities after the combination treatment of EP-100 with (A) doxorubicin, (B) paclitaxel, (C) topotecan, or (D) cisplatin. Dose-response curves for cell viability were

representative of three experiments. Fa-CI plots for different combinations of EP-100 and each drug at different doses required to achieve the desired effect (vary from 5% to 97%) in the ovarian cancer cells. CI values were calculated from three independent experiments. Error bars are standard deviations.

**Supplementary Figure S5. Protein expressions as detected by RPPA assay.** We normalized the data sets according to the process provided by MD Anderson RPPA core facility. (A) Activated or inhibited signaling pathways in EP-100 treatment compared to control group were analyzed by ingenuity pathway analysis. (B) A heatmap of protein expressions in all four treatments after normalization.

**Supplementary Figure S6. The combined effect of treatment with EP-100 and olaparib in a subcutaneous mice model.** Photographs of (A) harvested tumors in mice inoculated with HeyA8 cells that received a vehicle (control), 0.2 mg/kg EP-100, 50 mg/kg olaparib, or a combination of EP-100 and olaparib (olaparib was given 1 h after EP-100 administration) (n=5 per group). (B) The tumor volume and (C) tumor weights of each group at the end of the

experiment. The formula we used to calculate the tumor volume is: 
$$V = \frac{A \times B^2}{2}$$
. A and B represents the length and width of tumors, respectively.

**Supplementary Figure S7 (related to Supplementary Figure S1 and Supplementary Figure S2). The original figures of the Western Blotting bands for GnRH-R expression.** (A) The Western Blotting bands for Vinculin expression under short and long-time exposure. (B) The Western Blotting bands for GnRH-R expression under short and long-time exposure. (C) The original bands for GnRH-R expression in knockdown experiment from Supplementary Figure S2.

**Supplementary Figure S8 (related to Figure 4A). Representative comets from comet assays.** Images of HeyA8 and A2780ip2 cells treated with a vehicle (control), EP-100 (1  $\mu$ m),

olaparib (10  $\mu$ M), or EP-100 and olaparib.  $H_2O_2$  (0.5 mM) is used as positive control. Scale bar: 50  $\mu$ M.

**Supplementary Figure S9 (related to Figure 4C and D). Representative images from immunofluorescence assay.** (A) Immunofluorescence stains for  $\gamma$ H2AX foci formation in HeyA8 and A2780ip2 cells. (B) The stains for RAD 51 foci formation. Scale bar: 50  $\mu$ M.

Supplementary Figure S1

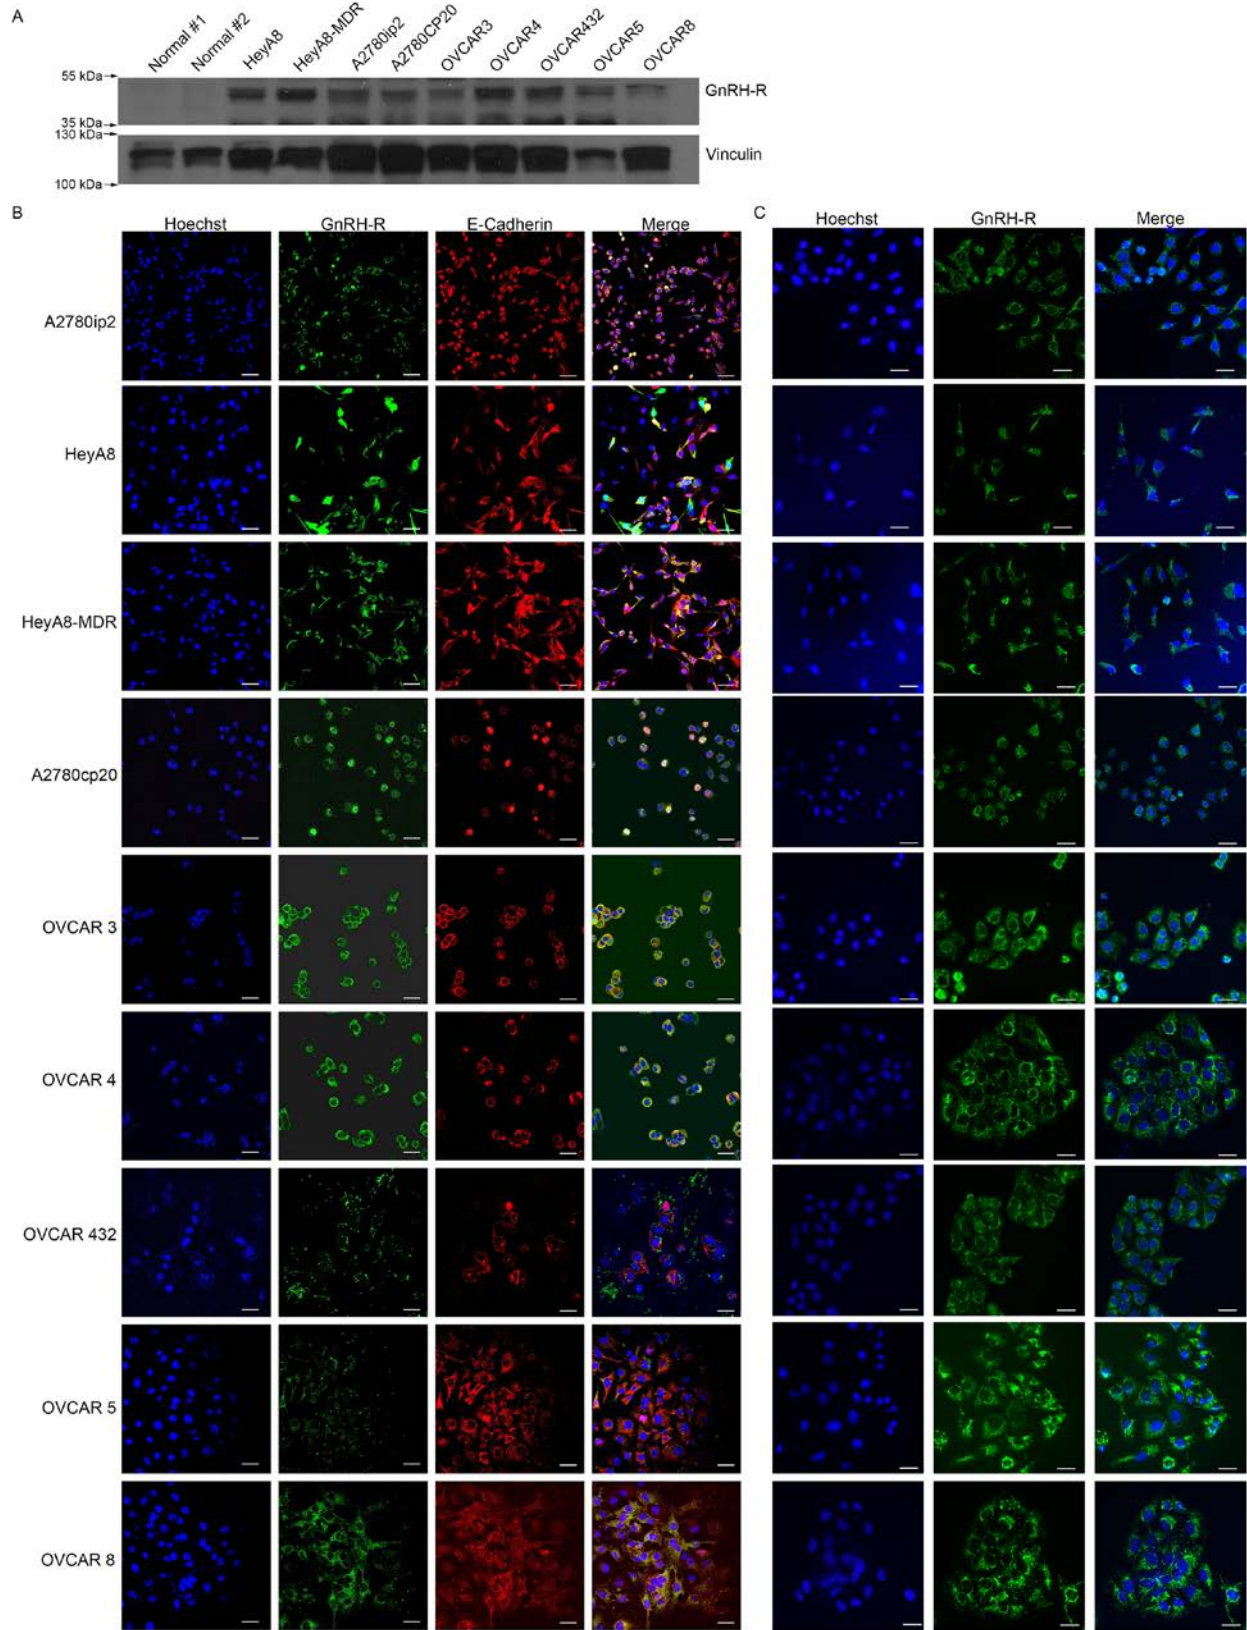

Supplementary Figure S2

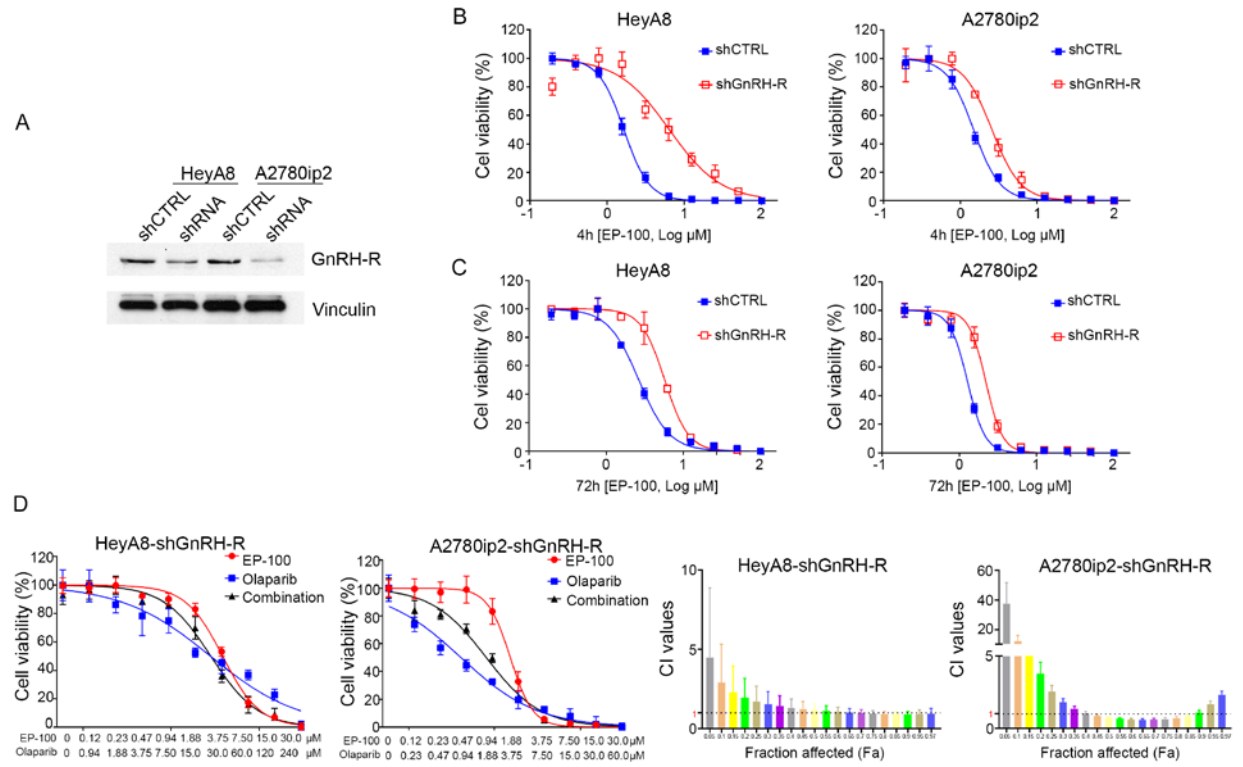

## Supplementary Figure S3

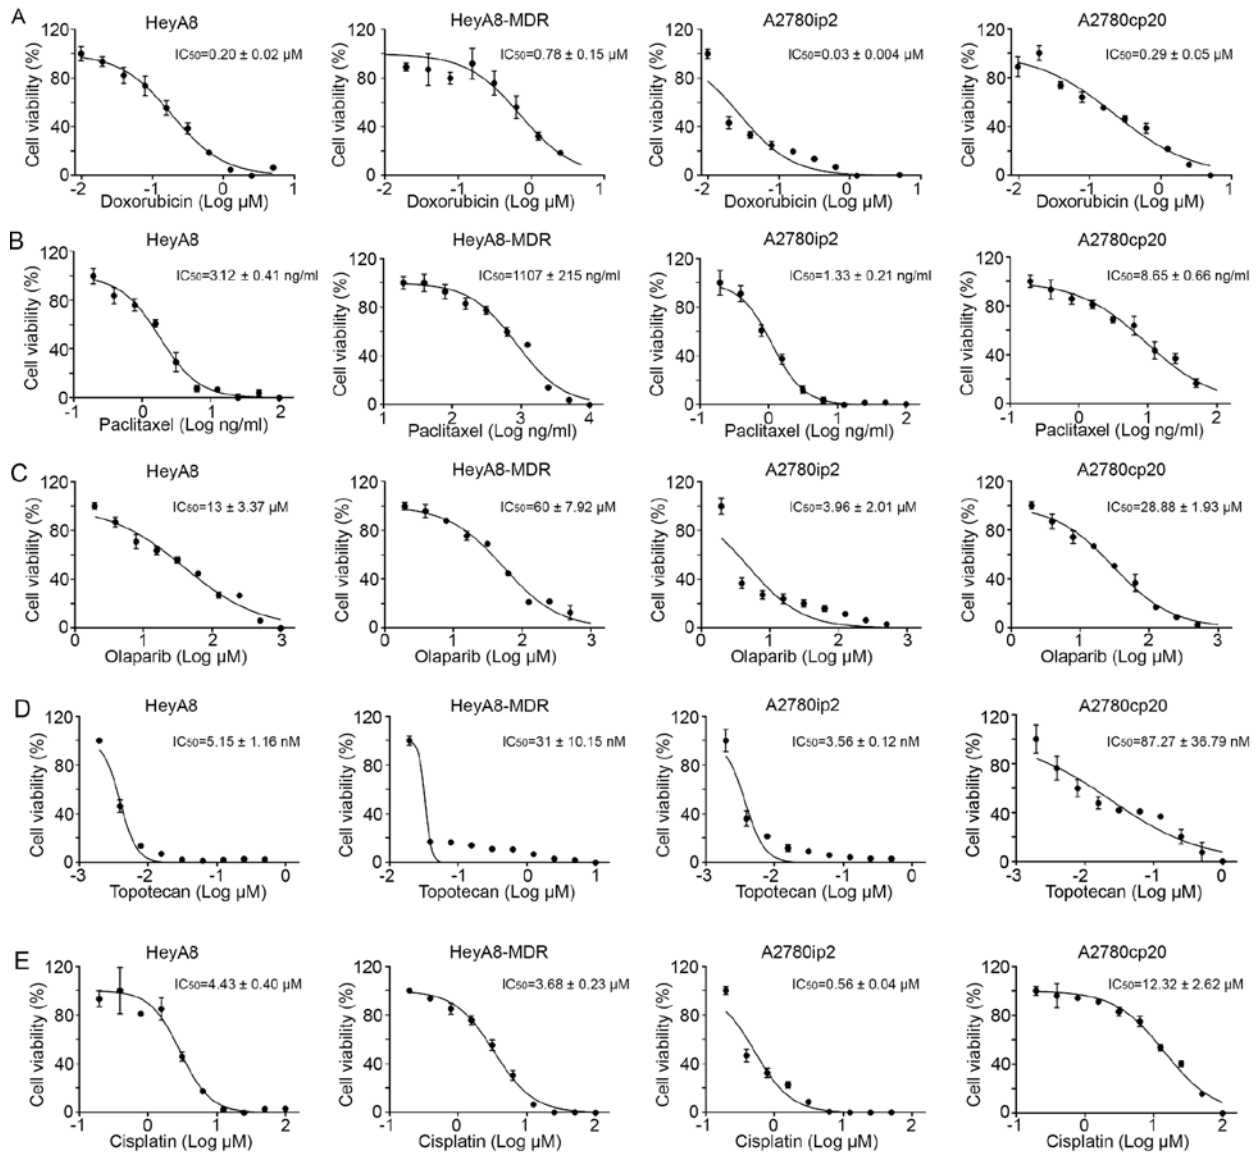



Supplementary Figure S4

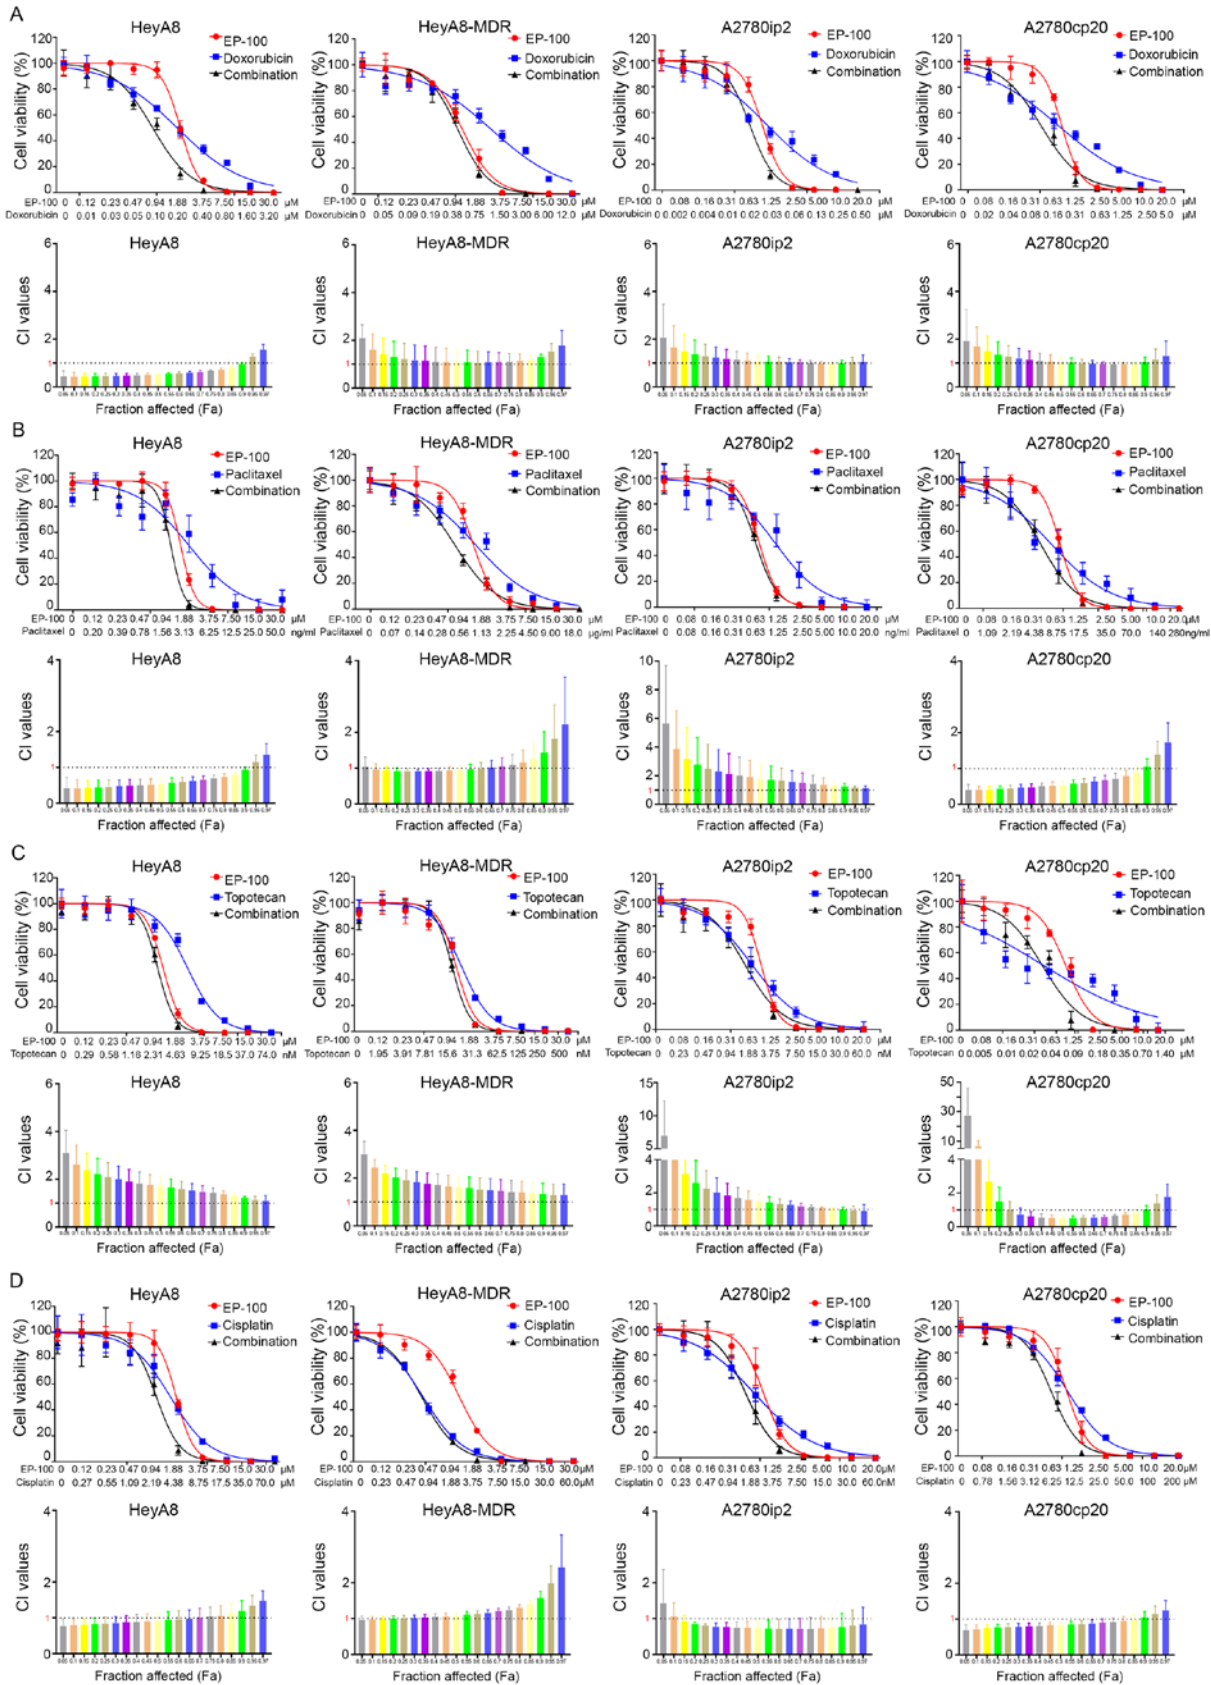

# Supplementary Figure S5

A

| Top Canonical Pathways              | p-Value  | Status                    |
|-------------------------------------|----------|---------------------------|
| PI3K/AKT Signaling                  | 1.22E-29 | Inhibited                 |
| Pancreatic Adenocarcinoma Signaling | 1.05E-25 | Activated                 |
| Ovarian Cancer Signaling            | 5.53E-25 | No activated or inhibited |
| ERK/MAPK Signaling                  | 6.46E-25 | Activated                 |

B

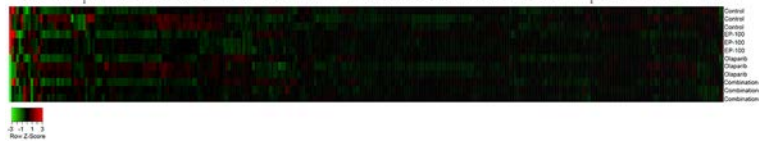

Supplementary Figure S6

A

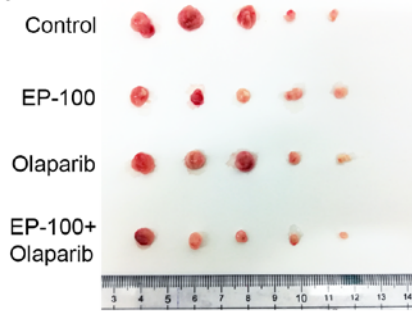

B

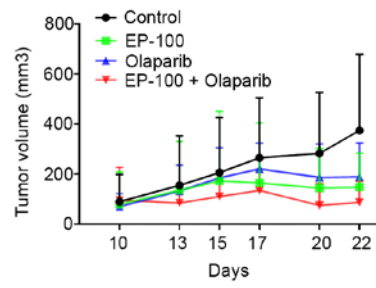

C

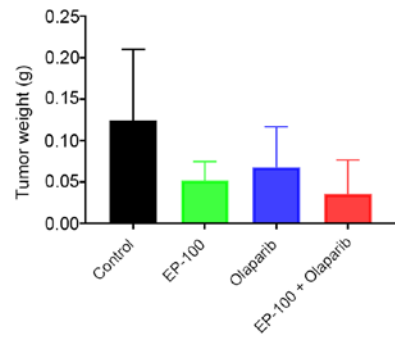

Supplementary Figure S7

A

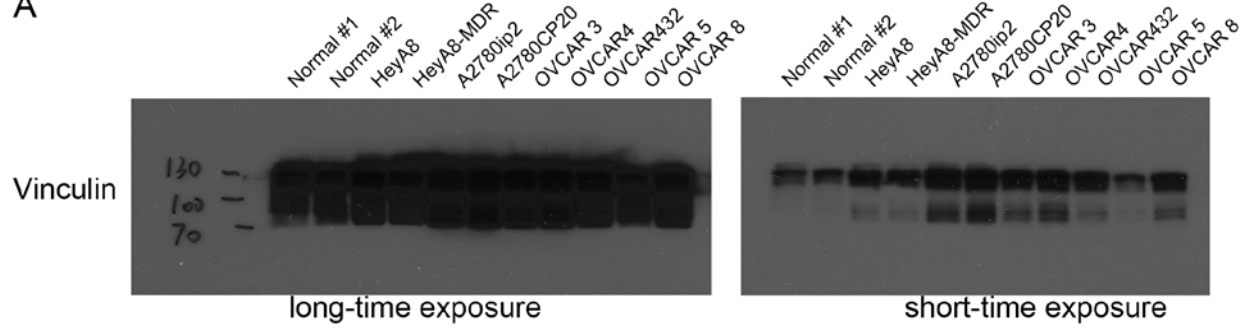

B

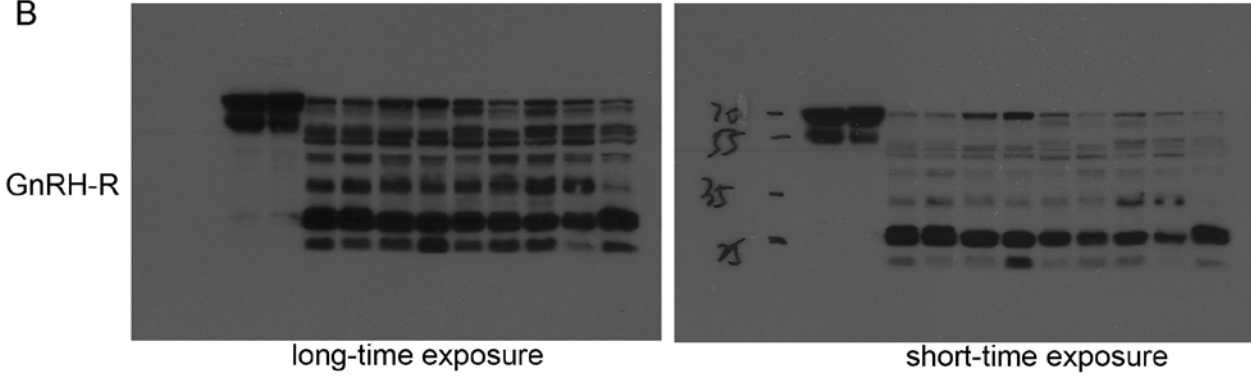

C

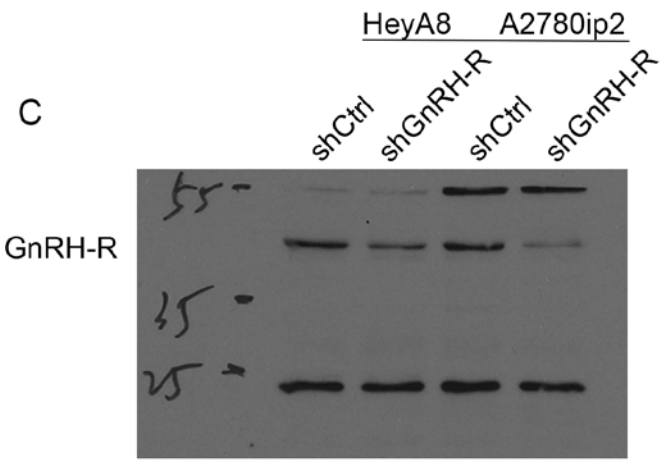

Supplementary Figure S8

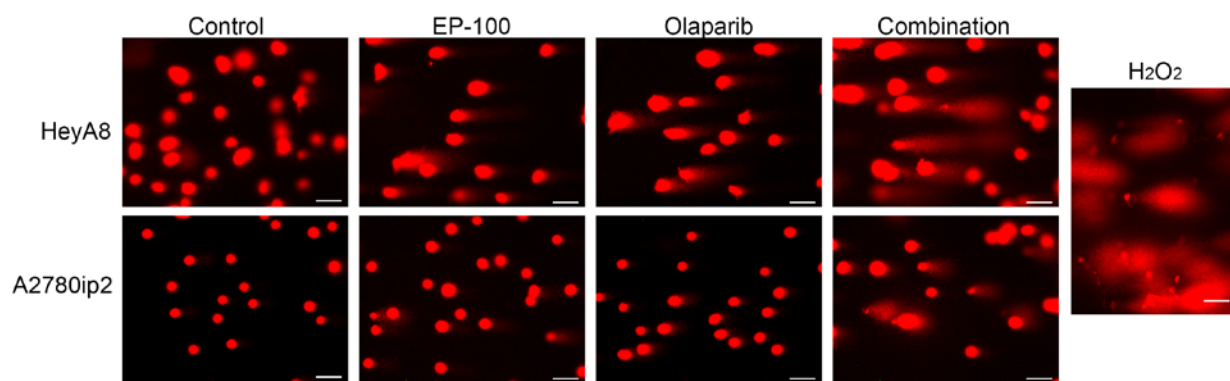

# Supplementary Figure S9

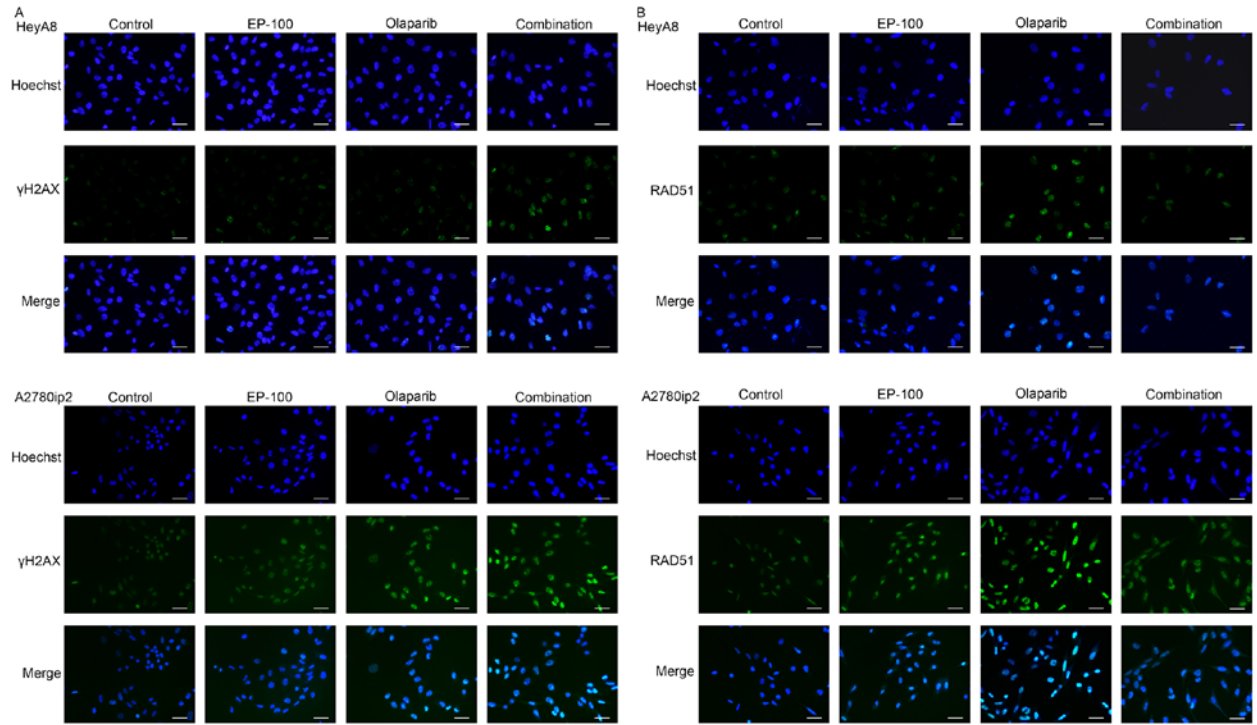

Supplement: NIHMS1525262-supplement-1.pdf [file NIHMS1525262-supplement-1.pdf]
