# Supplementary material
Source: PubMed Central journal article supplement (PMC6497555)
Supplement: NIHMS1525262-supplement-2.pdf [file NIHMS1525262-supplement-2.pdf]

**Supplementary Table S1** The IC<sub>50</sub>s of EP-100 against ovarian cancer cells after 4-, 24-, and 72-h treatment.

| Cell lines | IC <sub>50</sub> (μM, Mean ± SDs) |             |             |
|------------|-----------------------------------|-------------|-------------|
|            | 4h                                | 24h         | 72h         |
| HeyA8      | 2.56 ± 0.49                       | 1.44 ± 0.08 | 1.46 ± 0.48 |
| HeyA8-MDR  | 2.18 ± 0.12                       | 1.84 ± 0.43 | 1.66 ± 0.17 |
| A2780ip2   | 1.85 ± 0.19                       | 1.08 ± 0.14 | 0.88 ± 0.13 |
| A2780CP20  | 1.28 ± 0.26                       | 1.03 ± 0.12 | 0.80 ± 0.04 |
| OVCAR 3    | 2.41 ± 0.80                       | 1.62 ± 0.61 | 1.45 ± 0.35 |
| OVCAR 4    | 1.92 ± 0.34                       | 2.39 ± 1.03 | 2.29 ± 0.91 |
| OVCAR 432  | 1.46 ± 0.24                       | 1.90 ± 0.17 | 1.79 ± 0.41 |
| OVCAR 5    | 1.52 ± 0.08                       | 1.38 ± 0.08 | 1.53 ± 0.11 |
| OVCAR 8    | 1.60 ± 0.04                       | 1.72 ± 0.10 | 1.38 ± 0.34 |
