# Supplementary material
Source: PubMed Central journal article supplement (PMC6497555)
Supplement: NIHMS1525262-supplement-3.pdf [file NIHMS1525262-supplement-3.pdf]

**Supplementary Table S2** The IC<sub>50</sub>s of EP-100 against shRNA transfected ovarian cancer cells

| Cell lines        | IC <sub>50</sub> (μM, Mean ± SDs) |               |
|-------------------|-----------------------------------|---------------|
|                   | 4h                                | 72h           |
| HeyA8-shCtrl      | 2.13 ± 0.43                       | 2.89 ± 0.66   |
| HeyA8-shGnRH-R    | 6.22 ± 0.15 **                    | 5.58 ± 0.18 * |
| A2780ip2-shCtrl   | 1.25 ± 0.39                       | 1.55 ± 0.43   |
| A2780ip2-shGnRH-R | 2.11 ± 0.73 *                     | 2.43 ± 0.45   |

\* P < 0.05 and \*\* P < 0.01 compared with shCtrl cells.
